# Supplementary material for: Urban heat forecasting in small cities: Evaluation of a high-resolution operational numerical weather prediction model
Source: Copernicus journal article supplement (doi:10.5194/egusphere-2025-3397), 2025-07-31
Supplement: Supplementary file 1 [file egusphere-2025-3397-supplement.pdf]

*Supplement of*

# **Urban heat forecasting in small cities: Evaluation of a high-resolution operational numerical weather prediction model**

Yuqi Huang<sup>1</sup>, Chenghao Wang<sup>1,2</sup>, Tyler Danzig<sup>3</sup>, Temple R. Lee<sup>4</sup>, Sandip Pal<sup>3</sup>

5 <sup>1</sup>School of Meteorology, University of Oklahoma, Norman, 73072, USA

<sup>2</sup>Department of Geography and Sustainability, University of Oklahoma, Norman, 73019, USA

<sup>3</sup>Department of Geosciences, Texas Tech University, Lubbock, 79409, USA

<sup>4</sup>NOAA/Air Resources Laboratory, Oak Ridge, 37830, USA

*Correspondence to:* Chenghao Wang ([chenghao.wang@ou.edu](mailto:chenghao.wang@ou.edu))

10

15

20

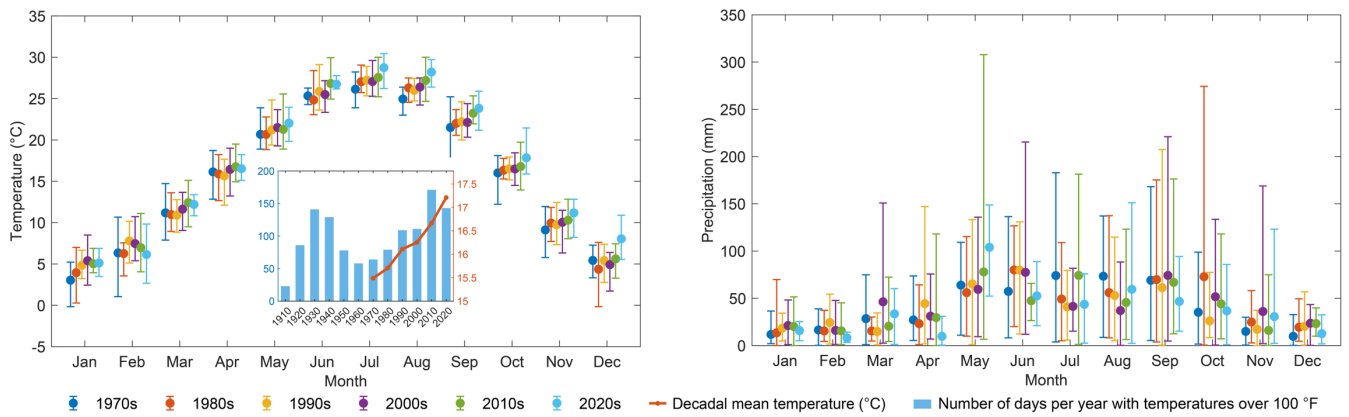

**Figure S1.** Local background climate characteristics of Lubbock, Texas: (a) Decadal average of monthly temperature variations, where error bars indicate the intra-decadal monthly maximum and minimum temperatures. The bar plot within the subplot denotes the total number of days per decade with maximum temperatures exceeding 37.78 °C (100°F), while the red line represents the decadal mean temperature. (b) Decadal average of monthly precipitation. Data source: NOAA Online Weather Data (<https://www.weather.gov/wrh/Climate?wfo=lub>).

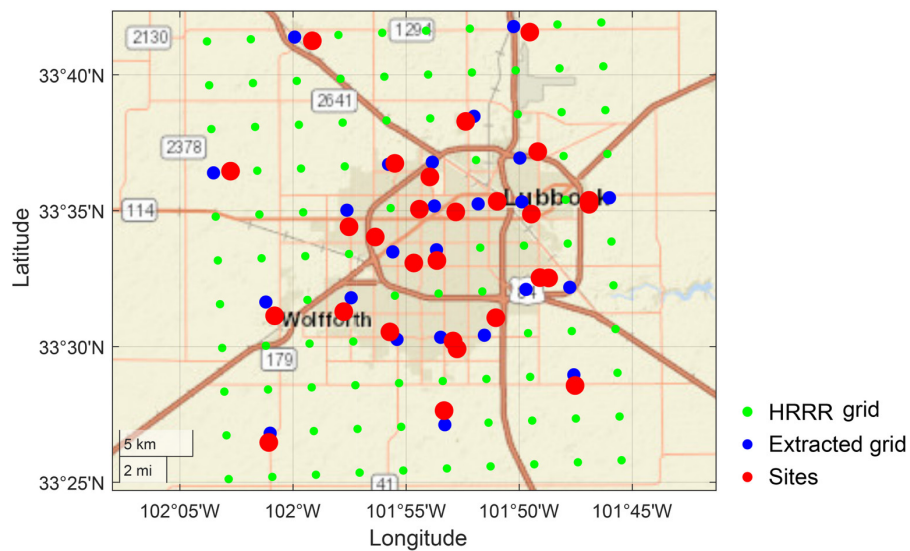

**Figure S2.** Locations of observation sites (red) and corresponding HRRR grid points (blue) used for model evaluation.

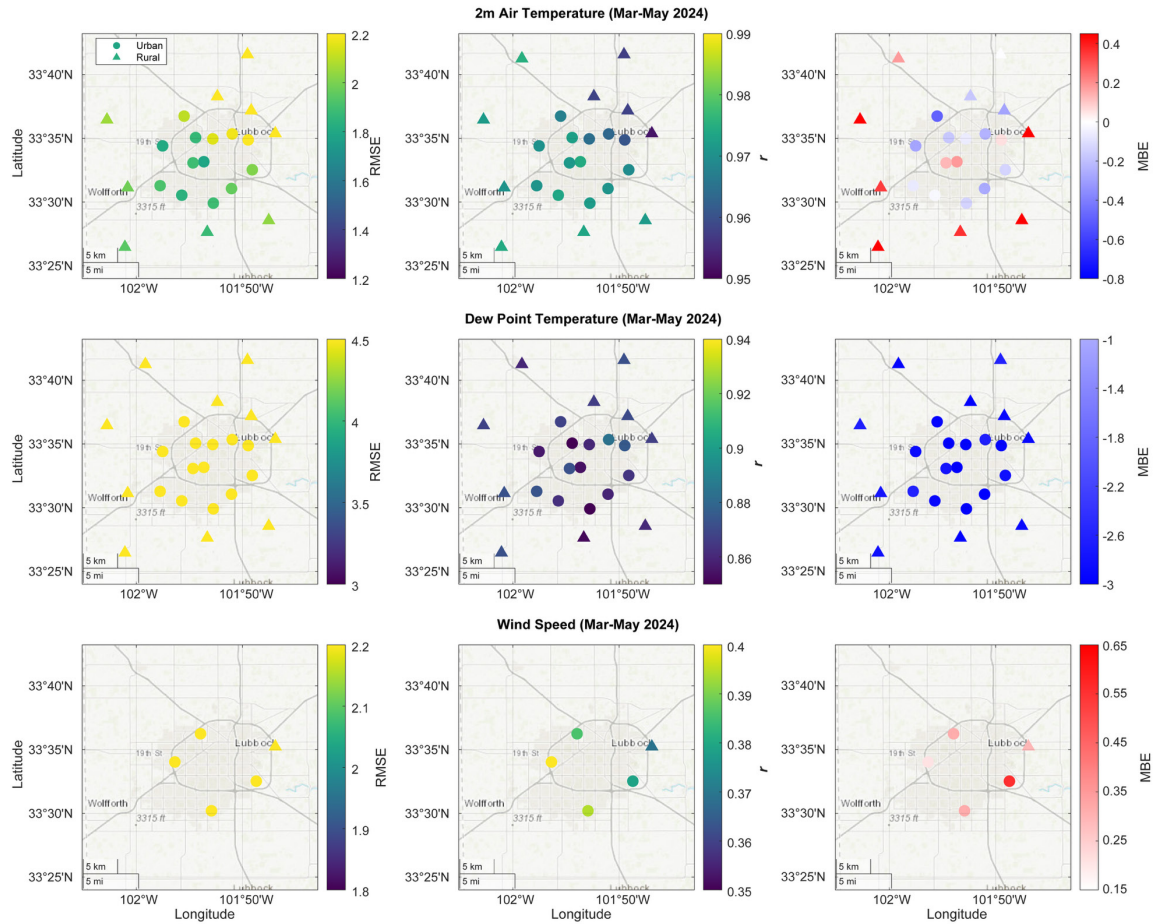

**Figure S3.** Site-specific evaluation of HRRR 18-h forecasts against in situ observations in and around Lubbock, Texas during spring (March 2024 to May 2024). Rows correspond to different variables: 2-m air temperature (top), 2-m dew point temperature (middle), and 10-m wind speed (bottom). Columns show spatial distributions of three statistical metrics: Root Mean Square Error (RMSE; left), correlation coefficient ( $r$ ; middle), and Mean Bias Error (MBE; right). Urban and rural sites are color-coded by metric value, with urban and rural sites marked by circles and triangles, respectively.

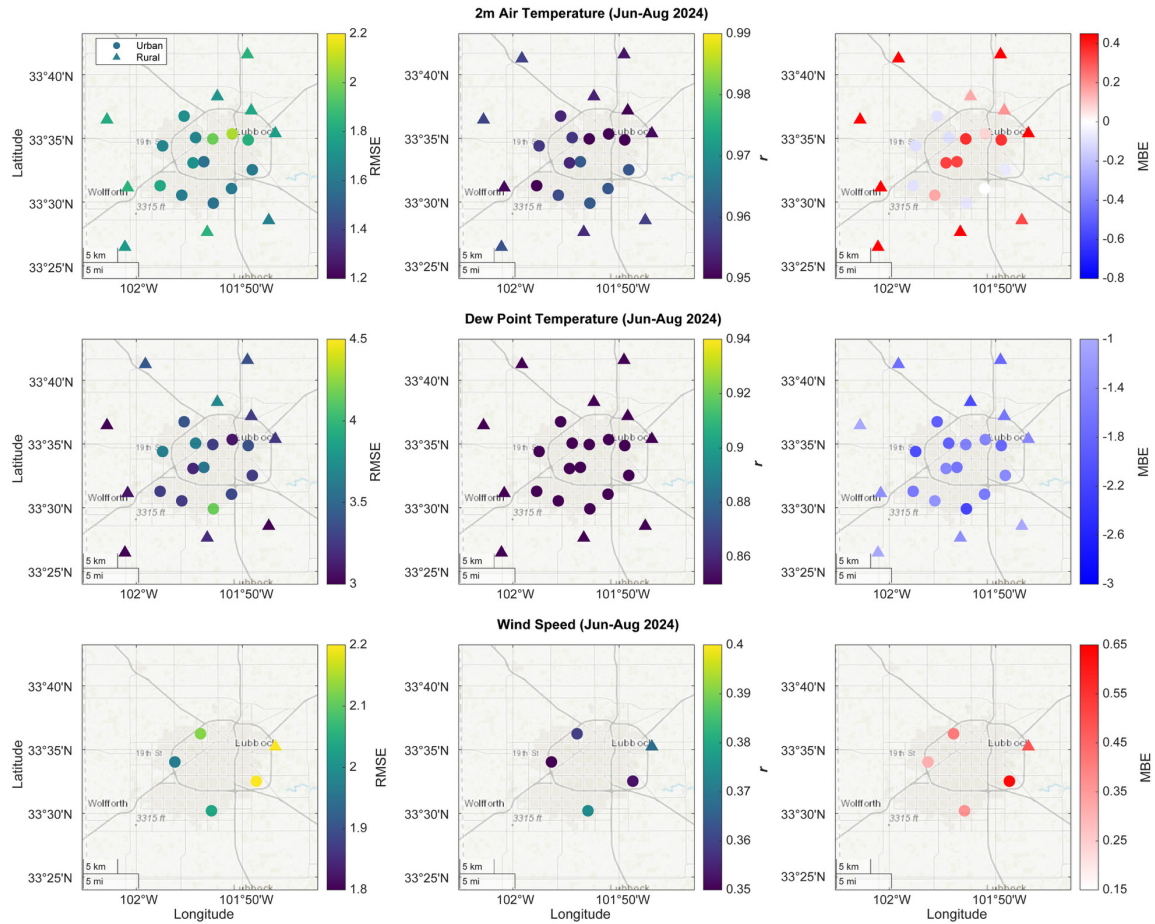

**Figure S4.** Site-specific evaluation of HRRR 18-h forecasts against in situ observations in and around Lubbock, Texas during summer (June 2024 to August 2024). Rows correspond to different variables: 2-m air temperature (top), 2-m dew point temperature (middle), and 10-m wind speed (bottom). Columns show spatial distributions of three statistical metrics: Root Mean Square Error (RMSE; left), correlation coefficient ( $r$ ; middle), and Mean Bias Error (MBE; right). Urban and rural sites are color-coded by metric value, with urban and rural sites marked by circles and triangles, respectively.

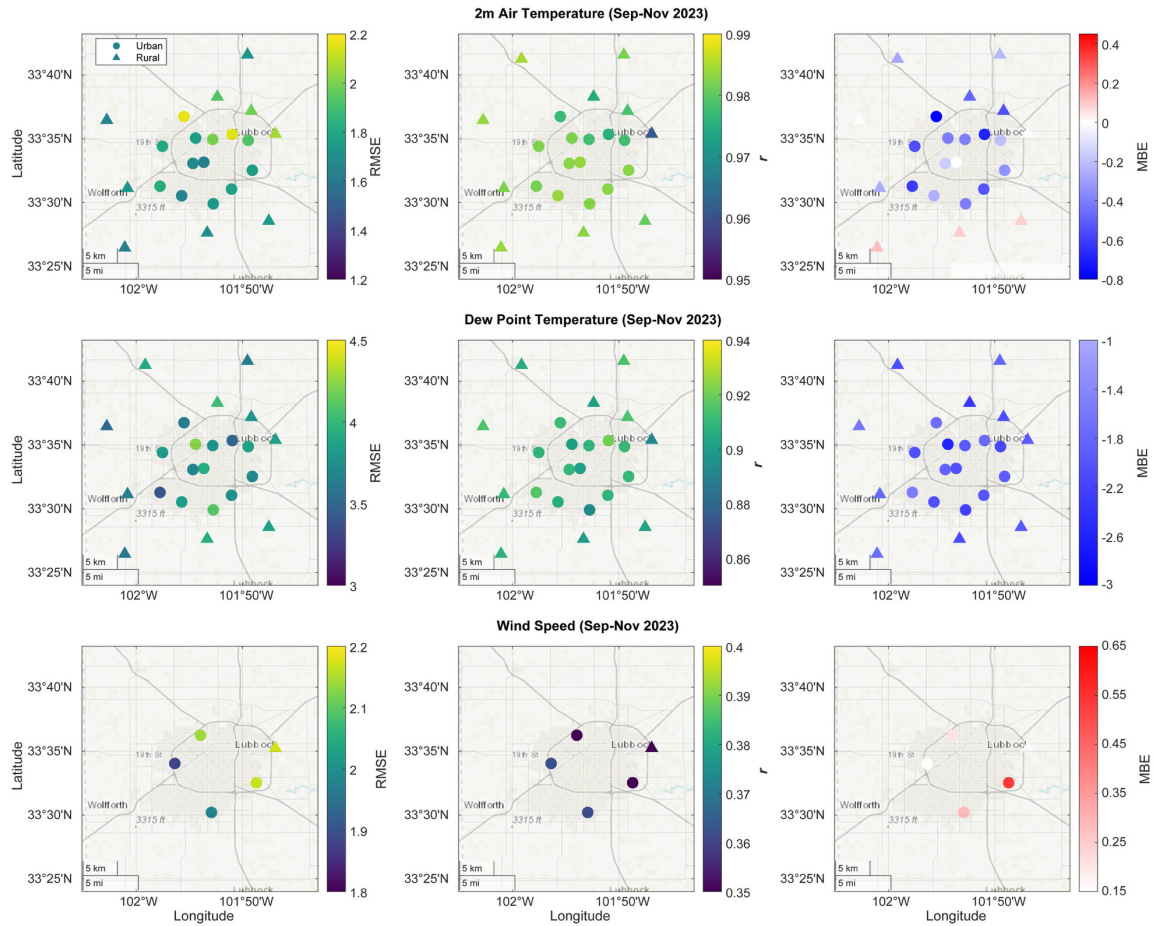

**Figure S5.** Site-specific evaluation of HRRR 18-h forecasts against in situ observations in and around Lubbock, Texas during fall (September 2023 to November 2023). Rows correspond to different variables: 2-m air temperature (top), 2-m dew point temperature (middle), and 10-m wind speed (bottom). Columns show spatial distributions of three statistical metrics: Root Mean Square Error (RMSE; left), correlation coefficient ( $r$ ; middle), and Mean Bias Error (MBE; right). Urban and rural sites are color-coded by metric value, with urban sites marked by circles and rural sites marked by triangles, respectively.



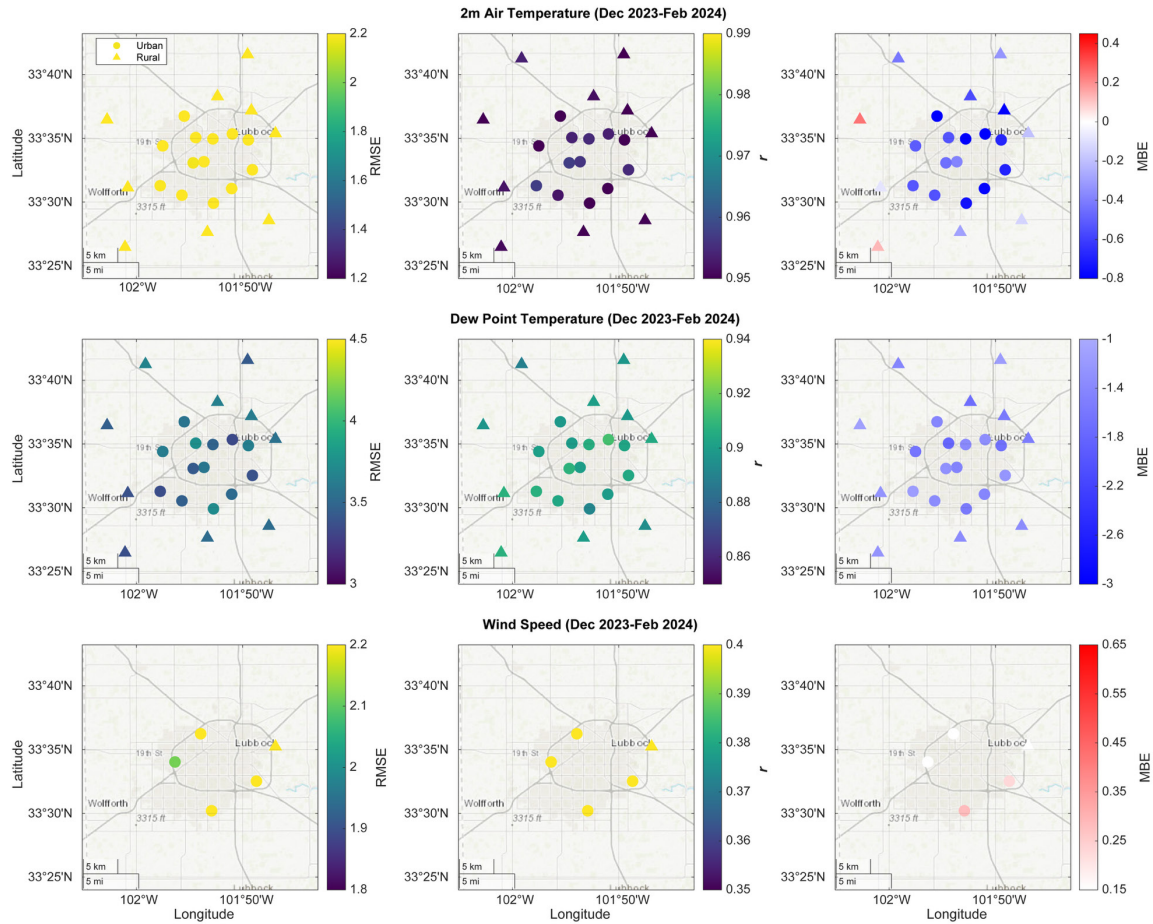

**Figure S6.** Site-specific evaluation of HRRR 18-h forecasts against in situ observations in and around Lubbock, Texas during winter (December 2023 to February 2024). Rows correspond to different variables: 2-m air temperature (top), 2-m dew point temperature (middle), and 10-m wind speed (bottom). Columns show spatial distributions of three statistical metrics: Root Mean Square Error (RMSE; left), correlation coefficient ( $r$ ; middle), and Mean Bias Error (MBE; right). Urban and rural sites are color-coded by metric value, with urban and rural sites marked by circles and triangles, respectively.

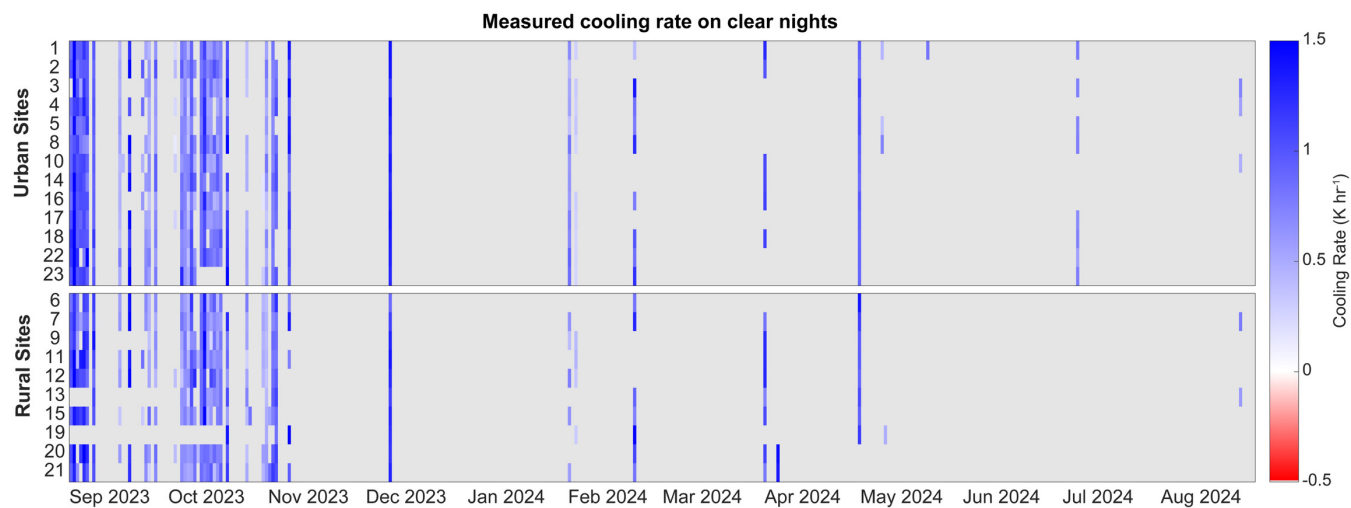

60 **Figure S7.** Observed nocturnal cooling rates (blue) on clear nights during the study period. Here, negative cooling rates (red) represent nocturnal warming. Clear nights are defined as having less than 25% cloud cover between 12:00 and 05:00 local time. Only statistically significant cooling rates ( $p < 0.05$ ) are shown. Station numbering is listed in Table S1.



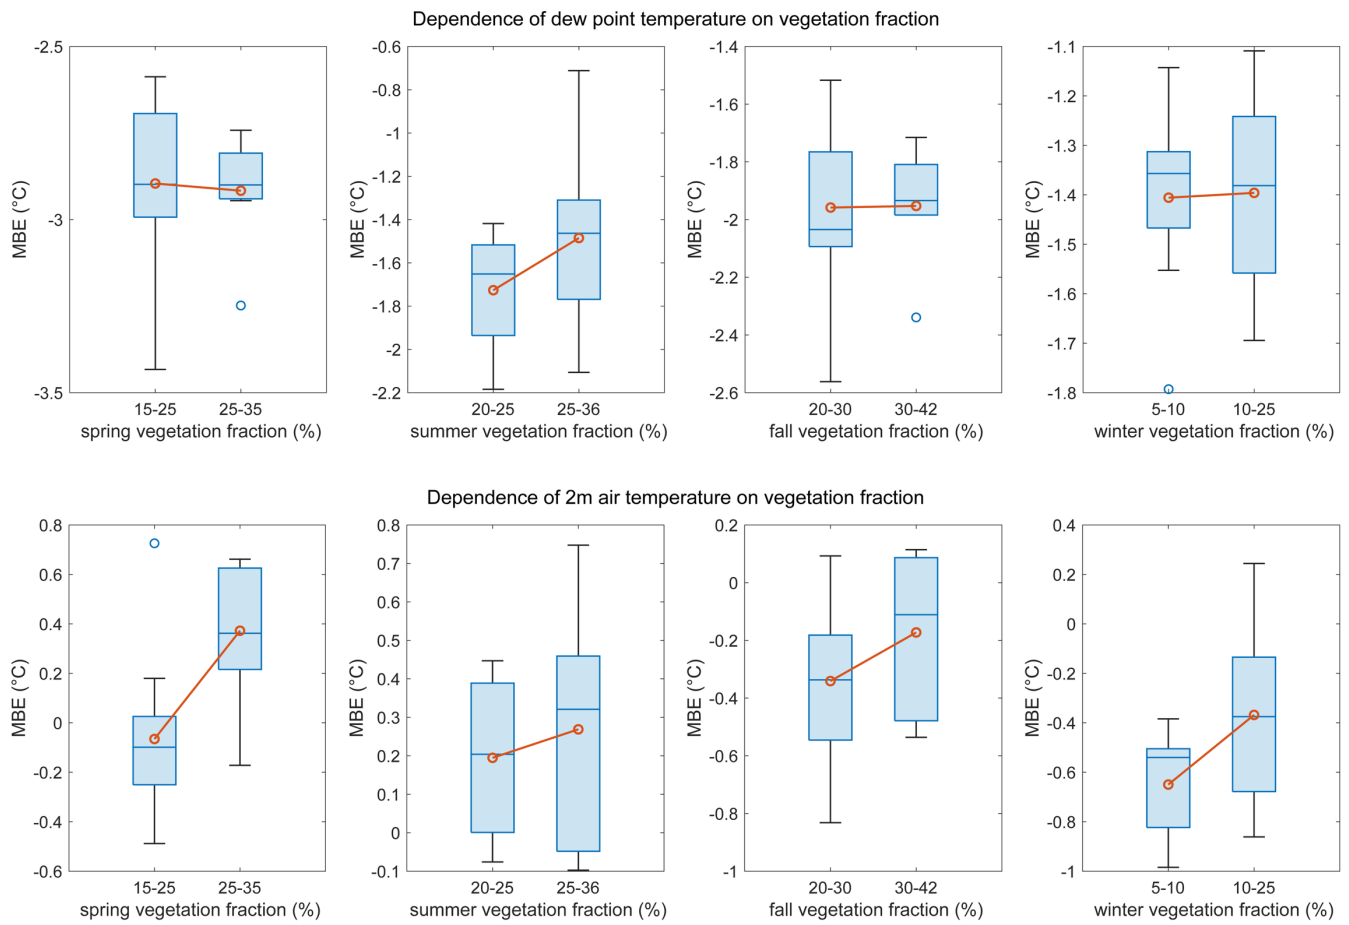

65 **Figure S8.** Dependence of MBE on dynamic vegetation fraction for 18-hour 2-m dew point temperature (top) and air temperature (bottom) forecasts across seasons.

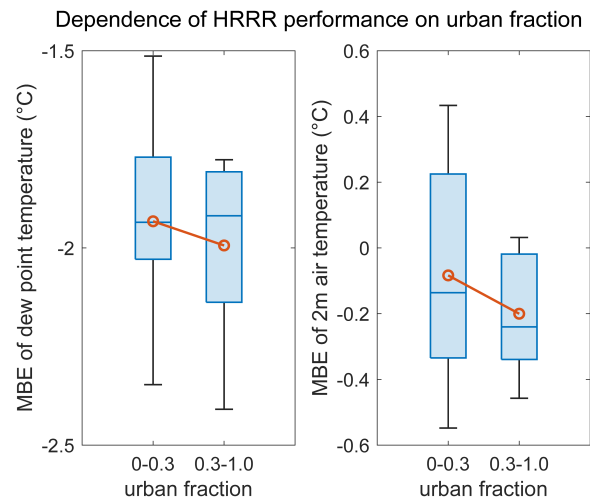

**Figure S9.** Dependence of MBE on urban fraction for 18-hour 2-m dew point temperature and air temperature forecasts.

**Table S1.** A summary of site locations, numbering as in Figure 6 and Figure S7, and their urban/rural classification

| Number | Site name                 | Latitude | Longitude | Site type |
|--------|---------------------------|----------|-----------|-----------|
| 1      | Ed George                 | 33.5528  | -101.8940 | urban     |
| 2      | Satsang                   | 33.5215  | -101.9626 | urban     |
| 3      | Windmill Museum           | 33.5813  | -101.8244 | urban     |
| 4      | Kaitlin Schueth           | 33.4986  | -101.8791 | urban     |
| 5      | South Plains Food Bank    | 33.5423  | -101.8180 | urban     |
| 6      | TAMU AgriLIFE             | 33.6928  | -101.8256 | rural     |
| 7      | Stanford St house         | 33.6196  | -101.8197 | rural     |
| 8      | Lubbock Civic Center      | 33.5891  | -101.8495 | urban     |
| 9      | Llano Estacado Winery     | 33.4761  | -101.7922 | rural     |
| 10     | Mark Conder               | 33.5090  | -101.9286 | urban     |
| 11     | Charles Aldrich           | 33.4411  | -102.0179 | rural     |
| 12     | Fenship HS                | 33.5189  | -102.0136 | rural     |
| 13     | Jorge Salazar-Bravo       | 33.6381  | -101.8728 | rural     |
| 14     | Robert Gentry             | 33.5735  | -101.9587 | urban     |
| 15     | Justin Weaver             | 33.4607  | -101.8887 | rural     |
| 16     | HTL                       | 33.5177  | -101.8506 | urban     |
| 17     | Covenant Church           | 33.5513  | -101.9110 | urban     |
| 18     | Susanne Gillette          | 33.5843  | -101.9069 | urban     |
| 19     | TTU Fiber research center | 33.5897  | -101.7819 | rural     |
| 20     | Reece Center              | 33.6076  | -102.0460 | rural     |
| 21     | Bruce Haynie              | 33.6875  | -101.9858 | rural     |
| 22     | MCOM                      | 33.5826  | -101.8801 | urban     |
| 23     | Sandip                    | 33.6124  | -101.9250 | urban     |
