# Supplementary material for: Urban heat forecasting in small cities: Evaluation of a high-resolution operational numerical weather prediction model
Source: Copernicus journal article supplement (doi:10.5194/egusphere-2025-3397), 2025-07-31
Supplement: Supplementary file [file egusphere-2025-3397-AC1-supplement.pdf]

**Responses to Executive Editor Dr. Astrid Kerkweg's comment:**

*in the "Code and data availability" section the information how to access the HRRR model code is missing. This information needs to be provided latest upon revision of the article.*

Thanks for pointing this out. We will include details on how to access the HRRR model code, including the specific namelist file, in the revised "Code and data availability" section. The updated section will read:

**"Code and data availability.** The NOAA Online Weather Data (NOWData) for Lubbock Area are available at <https://www.weather.gov/wrh/Climate?wfo=lub> (National Weather Service, 2025). Original HRRRv4 outputs can be accessed at <https://rapidrefresh.noaa.gov/hrrr/> (National Oceanic and Atmospheric Administration, 2025). HRRRv4 uses the Weather Research and Forecasting (WRF) model v3.9.1, which is available at [https://www2.mmm.ucar.edu/wrf/users/download/get\\_source.html](https://www2.mmm.ucar.edu/wrf/users/download/get_source.html) (National Center for Atmospheric Research, 2025), with the namelist provided at <https://rapidrefresh.noaa.gov/hrrr/wrf.nl.txt> (National Oceanic and Atmospheric Administration, 2025). The processed HRRRv4 data, observations from West Texas Mesonet and U-HEAT, and source code are available at <https://doi.org/10.5281/zenodo.15885174> (Huang and Wang, 2025)."

**References:**

National Center for Atmospheric Research: WRF Source Codes and Graphics Software Downloads, [https://www2.mmm.ucar.edu/wrf/users/download/get\\_source.html](https://www2.mmm.ucar.edu/wrf/users/download/get_source.html), last access: 4 October 2025.

National Oceanic and Atmospheric Administration: The High-Resolution Rapid Refresh (HRRR), <https://rapidrefresh.noaa.gov/hrrr/>, last access: 25 July 2025.

National Weather Service: NOWData - NOAA Online Weather Data, <https://www.weather.gov/wrh/Climate?wfo=lub>, last access: 25 July 2025.

Huang, Y. and Wang, C.: Evaluation of High-Resolution Rapid Refresh forecasts in small cities. Zenodo [code and data set], <https://doi.org/10.5281/zenodo.15885174>, 2025.

---
