# Supplementary material for: Urban heat forecasting in small cities: Evaluation of a high-resolution operational numerical weather prediction model
Source: Copernicus journal article supplement (doi:10.5194/egusphere-2025-3397), 2025-07-31
Supplement: Supplementary file [file egusphere-2025-3397-AC2-supplement.pdf]

## Responses to Reviewer #1's comments:

*This study comprehensively compared between HRRRv4 forecasts data with situ observations in a small-sized city located in the semi-arid climate of US. The detailed validation conducted on a medium-sized city remote from mega cities is particularly noteworthy, especially the inclusion of verification for urban heat advection. However, the content of this paper, particularly the sections of introduction and discussion, requires revision to highlight the study's key findings and insights.*

Thank you for your valuable feedback. Please see our point-to-point responses below.

---

### *Major comments*

*(1) The study provides a valuable analysis of Lubbock. To broaden the implications, might the authors consider incorporating additional small-sized cities with different climate backgrounds?*

We fully agree that multi-city comparisons would strength the generalizability of urban forecast evaluations. However, conducting a robust evaluation of urban heat forecasts in small cities requires unusually dense, city-scale observational networks to resolve key features such as the urban heat island (UHI) magnitude, nocturnal cooling, and intra-urban temperature/moisture gradients. Small-city networks of comparable density to our Lubbock setup are exceedingly rare. In fact, to our knowledge, the Lubbock network is the only one in the U.S. that provides publicly accessible data at this scale. Extending the analysis to small cities in additional climate regimes would therefore require new observational deployments, which is beyond the scope of this paper and the current project.

In addition, we deliberately chose a semi-arid small city as the initial testbed because drylands are particularly susceptible to climate change (Huang et al., 2017), which may further intensify UHI effects in these regions. Recent global modeling work also indicates that urbanization-driven biophysical warming and associated land–atmosphere feedbacks are stronger in water-limited (dry) regimes than in humid ones, underscoring dry cities as critical stress tests for operational urban forecasts (Zhang et al., 2025).

To acknowledge this limitation and clarify the study's broader relevance, in the revision, we will (i) clarify in the Introduction section why a dry/semi-arid small city provides a meaningful first testbed, and (ii) add discussion on the transferability of our findings across climates and city sizes, explicitly linking them to known, non-city-specific HRRR performance with appropriate caveats. We will also emphasize the need for future studies to replicate this framework in other small cities where similarly dense observations are available, and we will call for community efforts to establish and share such networks to enable systematic multi-climate benchmarking. We believe these additions will enhance the broader relevance of the paper while remaining aligned with the current scope.

Specifically, we plan to add the following content in the revised Introduction section: “Recent global modeling work also indicates that urbanization-induced warming and associated land–atmosphere feedback processes are stronger in water-limited (dry) regimes than in humid ones, underscoring dry cities as critical stress tests for operational urban forecasts (Zhang et

al., 2025).”

We also plan to add the following content in the revised Conclusions section: “Future work should advance evaluation and model development in parallel. Replicating this analysis in other small cities with similarly dense within-city observations will enable more systematic assessments of model performance across different climatic regimes. From a modeling perspective, our findings underscore the need for more realistic urban representations in NWP systems. Future developments should prioritize the integration of advanced urban canopy parameterizations, refined sub-grid land surface heterogeneity, and high-resolution urban observations. More broadly, this evaluation highlights the limitations of applying conventional NWP systems to urban environments without targeted enhancements. As cities face growing challenges from extreme heat and flooding, poor air quality, and evolving land cover, integrating urban-specific processes into NWP frameworks (Wang et al., 2025) will be essential to ensure accurate, actionable forecasts in both research and operational contexts.”

#### References:

Huang, J., Li, Y., Fu, C., Chen, F., Fu, Q., Dai, A., Shinoda, M., Ma, Z., Guo, W., Li, Z., Zhang, L., Liu, Y., Yu, H., He, Y., Xie, Y., Guan, X., Ji, M., Lin, L., Wang, S., Yan, H., and Wang, G.: Dryland climate change: Recent progress and challenges, *Rev. Geophys.*, 55, 719–778, <https://doi.org/10.1002/2016RG000550>, 2017.

Zhang, K., Fang, B., Oleson, K., Zhao, L., He, C., Huang, Q., Liu, Z., Cao, C., and Lee, X.: Urban land expansion amplifies surface warming more in dry climate than in wet climate: A global sensitivity study, *J. Geophys. Res. Atmospheres*, 130, e2024JD041696, <https://doi.org/10.1029/2024JD041696>, 2025.

---

*(2) Given that this study primarily focuses on the evaluation of HRRR forecasts, a more comprehensive overview of previous validation studies concerning HRRR (or other high-resolution operational forecasts) within the introduction would strengthen the argument. At the same time, the reasons for evaluating forecasts rather than reanalysis products should be more clearly presented.*

We appreciate this constructive suggestion. We interpret the reviewer’s use of “reanalysis” as referring to the HRRR 0-h analysis, which represents the model state at forecast initialization. Because HRRR’s operational configuration (including model physics and data assimilation) evolves over time, the 0-h analysis should not be treated as a true reanalysis product. To strengthen our argument, we plan to add the following summary of previous validation studies to the revised Introduction section:

“The forecast products from HRRR have been evaluated from a variety of perspectives in previous studies. These include assessments of warm-season precipitation over the U.S. Central Plains (Bytheway et al., 2017), cloud cover across the contiguous United States (Griffin et al., 2017), and convective storm characteristics in the eastern United States (Katona et al., 2016). More recent evaluations have focused on convective available potential energy, near-surface meteorology, and surface energy fluxes in Alabama (Lee et al., 2019; Wagner et al., 2019), as well as winds and gusts in New York State (Fovell and Gallagher,

2022). Beyond these evaluations, HRRR forecast products have increasingly been incorporated into urban applications. For example, HRRR forecasts have been coupled with hydrological models to support urban flood forecasting (Coelho et al., 2022) and used to improve air quality predictions (Park et al., 2025). To our knowledge, however, HRRR forecasts have never been systematically evaluated for urban heat dynamics.”

We will also clarify in the revised Introduction section why focusing on forecasts, rather than reanalysis products, is critical for operational urban heat applications. Specifically, we will add the following content in the revised Introduction section: “Importantly, NWP forecasts, rather than reanalysis products, are particularly critical for supporting urban resilience and heat mitigation through early warning systems ... Because operational heat warnings depend on lead-time forecast skill, evaluation efforts should focus on forecast fields, whereas reanalysis products, which assimilate observations, may mask systematic model errors and bias performance assessments.”

These revisions will make our rationale for focusing on forecast skill more explicit.

#### References:

- Bytheway, J. L., Kummerow, C. D., and Alexander, C.: A features-based assessment of the evolution of warm season precipitation forecasts from the HRRR model over three years of development. *Weather Forecast.*, 32, 1841–1856, <https://doi.org/10.1175/WAF-D-17-0050.1>, 2017.
- Coelho, G. D. A., Ferreira, C. M., and Kinter Iii, J. L.: Multiscale and multi event evaluation of short-range real-time flood forecasting in large metropolitan areas, *J. Hydrol.*, 612, 128212, <https://doi.org/10.1016/j.jhydrol.2022.128212>, 2022.
- Fovell, R. G. and Gallagher, A.: An evaluation of surface wind and gust forecasts from the high-resolution rapid refresh model. *Weather Forecast.*, 37, 1049–1068, <https://doi.org/10.1175/WAF-D-21-0176.1>, 2022.
- Griffin, S. M., Otkin, J. A., Rozoff, C. M., Sieglaff, J. M., Cronic, L. M., Alexander, C. R., Jensen, T. L., and Wolff, J. K.: Seasonal analysis of cloud objects in the High-Resolution Rapid Refresh (HRRR) model using object-based verification. *J. Appl. Meteorol. Climatol.*, 56, 2317–2334, <https://doi.org/10.1175/JAMC-D-17-0004.1>, 2017.
- Katona, B., Markowski, P., Alexander, C., and Benjamin, S.: The influence of topography on convective storm environments in the eastern United States as deduced from the HRRR. *Weather Forecast.*, 31, 1481–1490, <https://doi.org/10.1175/WAF-D-16-0038.1>, 2016.
- Lee, T. R., Buban, M., Turner, D. D., Meyers, T. P., and Baker, C. B.: Evaluation of the High-Resolution Rapid Refresh (HRRR) Model using near-surface meteorological and flux observations from Northern Alabama, *Weather Forecast.*, 34, 635–663, <https://doi.org/10.1175/WAF-D-18-0184.1>, 2019.
- Park, S., Sayeed, A., Seo, J., Henderson, B. H., Naeger, A. R., and Gupta, P.: Hour by hour PM<sub>2.5</sub> mapping using geostationary satellites. *ACS ES&T Air*, 2, 1816–1830, <https://doi.org/10.1021/acsestair.4c00365>, 2025.
- Wagner, T. J., Klein, P. M., and Turner, D. D.: A new generation of ground-based mobile

*(3) Lines 62–77: The introduction of ULSM/UCM is too detailed. Such description may initially lead readers to assume that the paper is about developing or coupling a new UCM into NWP. A more appropriate focus would be on the limited assessment of slab models within operational forecasting.*

Thank you for the helpful suggestion. We agree and will revise this section to better align with our paper’s focus. Specifically, we will remove less relevant details regarding the implementation of advanced urban canopy models in various modeling systems, add an explicit statement that this work evaluates the operational HRRR with a slab urban scheme, and condense this paragraph to emphasize the role of slab models in operational NWP and the lack of forecast-focused evaluations.

The revised paragraph will read:

“Recent advances in high-resolution urban land-use datasets and urban land surface models (ULSMs) have substantially improved urban representation in numerical models (Chen et al., 2011; Lipson et al., 2024; Stewart et al., 2014). Among ULSMs, simple one-dimensional slab models remain widely used in operational NWP because they are computationally efficient (Oleson et al., 2008) and perform reasonably well in simulating urban surface energy fluxes over predominantly impervious surfaces with strong sensible heat fluxes (Jongen et al., 2024; Lipson et al., 2024). However, these models idealize the urban surface as a homogeneous layer and oversimplify radiative and hydrological processes that are increasingly important in cities with nature-based solutions such as urban vegetation, green infrastructure, and irrigation (Huang et al., 2025; Wang et al., 2025). While slab models have been critiqued for their structural simplicity and are often considered surpassed by more advanced urban schemes in research applications, they remain the default choice in many operational forecasting systems. Despite this continued use, there has been limited evaluation of their forecast performance, especially with respect to capturing fine-scale spatiotemporal variations in urban heat. Addressing this gap is crucial for enhancing urban heat forecasting and informing the development of more accurate and adaptive urban land surface parameterizations for operational use.”

#### References:

Chen, F., Kusaka, H., Bornstein, R., Ching, J., Grimmond, C. S. B., Grossman - Clarke, S., Loridan, T., Manning, K. W., Martilli, A., Miao, S., Sailor, D., Salamanca, F. P., Taha, H., Tewari, M., Wang, X., Wyszogrodzki, A. A., and Zhang, C.: The integrated WRF/urban modelling system: development, evaluation, and applications to urban environmental problems, Int. J. Climatol., 31, 273–288, <https://doi.org/10.1002/joc.2158>, 2011.

Huang, Y., Wang, C., and Wang, Z.-H. Multi-parameterization of hydrological processes in an urban canopy model. Build. Environ., 285, 113567, <https://doi.org/10.1016/j.buildenv.2025.113567>, 2025.

Jongen, H. J. et al.: The Water Balance Representation in Urban - PLUMBER Land Surface

Models, J. Adv. Model. Earth Syst., 16, e2024MS004231, <https://doi.org/10.1029/2024MS004231>, 2024.

Lipson, M. J. et al.: Evaluation of 30 urban land surface models in the URBAN - PLUMBER project: Phase 1 results, Q. J. R. Meteorol. Soc., 150, 126 – 169, <https://doi.org/10.1002/qj.4589>, 2024.

Oleson, K. W., Bonan, G. B., Feddema, J., Vertenstein, M., and Grimmond, C. S. B.: An Urban Parameterization for a Global Climate Model. Part I: Formulation and Evaluation for Two Cities, J. Appl. Meteorol. Climatol., 47, 1038–1060, <https://doi.org/10.1175/2007JAMC1597.1>, 2008.

Stewart, I. D., Oke, T. R., and Krayenhoff, E. S.: Evaluation of the ‘local climate zone’ scheme using temperature observations and model simulations, Int. J. Climatol., 34, 1062–1080, <https://doi.org/10.1002/joc.3746>, 2014.

Wang, C., Zhao, Y., Li, Q., Wang, Z.-H., and Fan, J.: Ultrafine - Resolution Urban Climate Modeling: Resolving Processes Across Scales, J. Adv. Model. Earth Syst., 17, e2025MS005053, <https://doi.org/10.1029/2025MS005053>, 2025.

---

*(4) The focus on a small-sized city is an important contribution. To better highlight this value, the results and discussion could both include more explicit comparisons with validation results from large metropolitan areas. For example, how do the prediction errors of HRRRv4 forecasts data found in Lubbock differ (in quantitative terms) from errors reported in studies of large cities?*

Thank you for this valuable suggestion. To our knowledge, quantitative evaluations of urban heat forecasts based on HRRRv4 for large metropolitan areas remain rather limited, and this gap is one of the motivations for our study, albeit conducted in a smaller city. That said, we agree that incorporating quantitative comparisons with previous evaluations would strengthen our discussion. In the revised Discussion section, we plan to add comparisons with three previous studies, although all of which focus on non-urban sites and/or CONUS-scale evaluations rather than metropolitan areas. Specifically, the following content will be added:

“For instance, Lee et al. (2019) evaluated 1-hour HRRRv2 forecasts of 2-m air temperature using two micrometeorological towers in rural northern Alabama and reported comparable daytime warm biases (average MBE = 0.85 °C) and nighttime cold biases (average MBE = – 0.75 °C). A subsequent evaluation of HRRRv4 against 114 stations of the U.S. Climate Reference Network suggested an average MBE of approximately 0.4 °C for 18-hour forecasts in 2021 (Lee et al., 2023b).”

“A recent evaluation of HRRRv4 using 788 Automated Surface Observing System (ASOS) stations across the U.S. found nearly perfect correlations between observed and forecasted 10-m wind speeds, independent of forecast hour or time of day (Fovell and Capps, 2024). However, this evaluation was biased toward well-exposed stations. In the same study, a regional evaluation using 121 New York State Mesonet (NYSM) stations reported an average MBE of 1.22 m s<sup>-1</sup>, which is generally consistent with but slightly higher than our results. Notably, several rooftop urban weather stations in New York City were excluded from this

evaluation due to mismatches with model heights (Fovell and Capps, 2024), which further illustrates the current lack of robust urban forecast evaluations.”

#### References:

Fovell, R. G. and Capps, S. B.: Sustained wind forecasts from the High-Resolution Rapid Refresh model: skill assessment and bias mitigation, *Atmosphere*, 16, 16, <https://doi.org/10.3390/atmos16010016>, 2024

Lee, T. R., Buban, M., Turner, D. D., Meyers, T. P., and Baker, C. B.: Evaluation of the High-Resolution Rapid Refresh (HRRR) Model Using Near-Surface Meteorological and Flux Observations from Northern Alabama, *Weather Forecast.*, 34, 635–663, <https://doi.org/10.1175/WAF-D-18-0184.1>, 2019.

Lee, T. R., Leeper, R. D., Wilson, T., Diamond, H. J., Meyers, T. P., and Turner, D. D.: Using the U.S. Climate Reference Network to Identify Biases in Near- and Subsurface Meteorological Fields in the High-Resolution Rapid Refresh (HRRR) Weather Prediction Model, *Weather Forecast.*, 38, 879–900, <https://doi.org/10.1175/WAF-D-22-0213.1>, 2023b.

---

#### *Minor*

*The acronym urban heat advection (UHA) is only defined in the abstract. Please also spell it out at its first occurrence in the introduction*

Thank you for pointing this out. We will add the full name of UHA at its first occurrence in the revised Introduction section.

---
